# Supplementary material for: Joint Effect of MCP-1 Genotype GG and MMP-1 Genotype 2G/2G Increases the Likelihood of Developing Pulmonary Tuberculosis in BCG-Vaccinated Individuals
Source: PubMed Central journal article supplement (PMC2810343; doi:10.1371/journal.pone.0008881), 2010-01-25

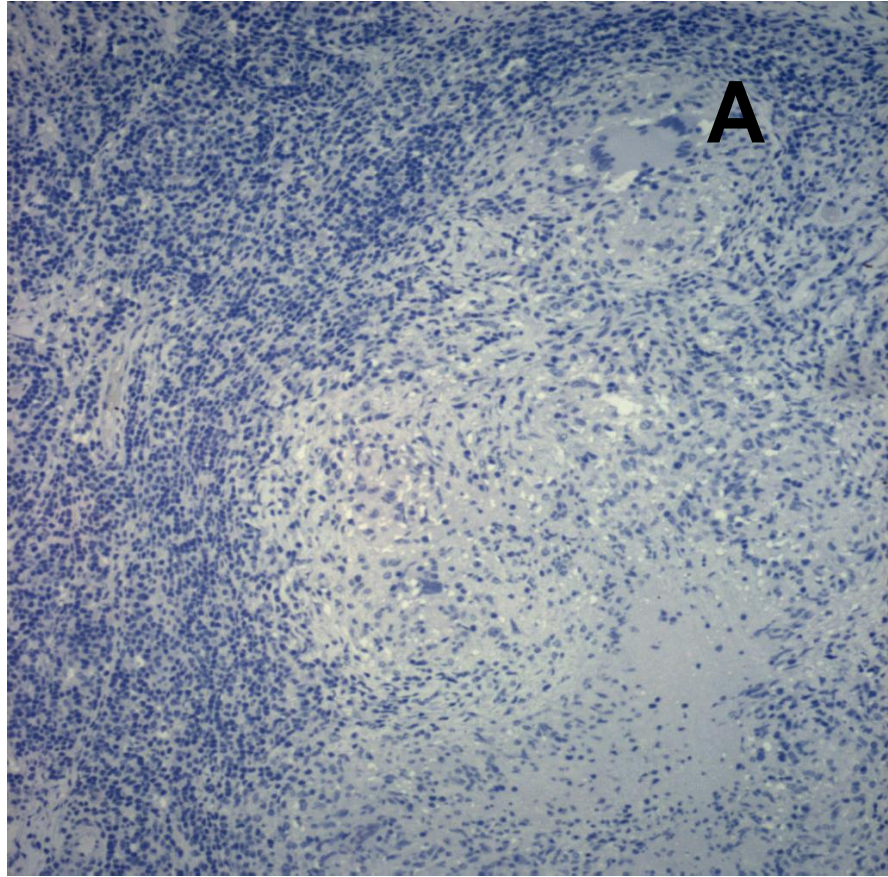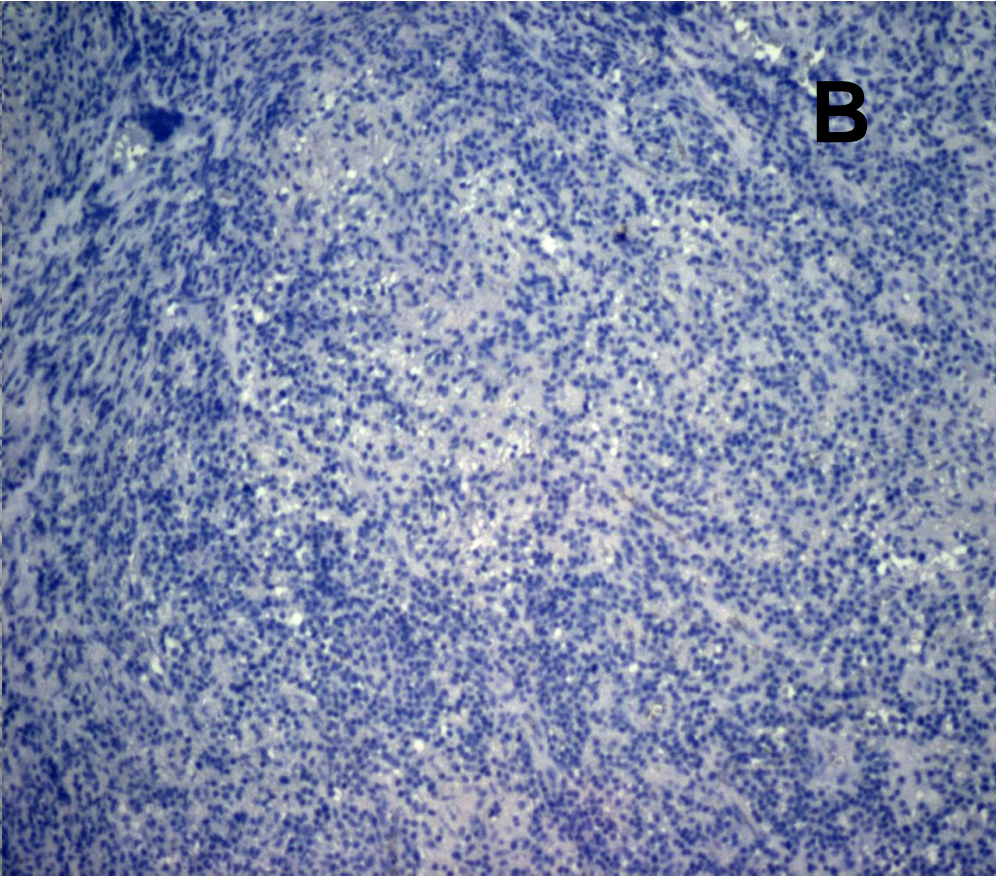

Supplement: pone.0008881.s003.pdf [file pone.0008881.s003.pdf]
